# Supplementary material for: SLC6A3, HTR2C and HTR6 Gene Polymorphisms and the Risk of Haloperidol-Induced Parkinsonism
Source: MDPI journal article supplement (doi:10.3390/biomedicines10123237), 2022-12-13
Supplement: s1 [file s1]

**Supplementary table S1.** ESRS based AIP scores in haloperidol-treated schizophrenia patients with different *HTR2C* rs3813929 alleles.

| Parkinsonism examination instrument       | ESRS based AIP scores in different <i>HTR2C</i> rs3813929 allele carriers |           |
|-------------------------------------------|---------------------------------------------------------------------------|-----------|
|                                           | C                                                                         | T         |
| ESRS subscale II for parkinsonism         | 6 (0; 18)                                                                 | 4 (0; 17) |
|                                           | U=3731.50; p=0.747                                                        |           |
| Expressive automatic movements            | 0 (0; 2)                                                                  | 0 (0; 1)  |
|                                           | U=3761.00; p=0.794                                                        |           |
| Bradykinesia                              | 0 (0; 2)                                                                  | 0 (0; 2)  |
|                                           | U=3785.00; p=0.853                                                        |           |
| Rigidity                                  | 0 (0; 6)                                                                  | 0 (0; 6)  |
|                                           | U=3719.50; p=0.702                                                        |           |
| Gait and posture                          | 0 (0; 2)                                                                  | 0 (0; 2)  |
|                                           | U=3809.00; p=0.907                                                        |           |
| Tremor / ESRS subscore Hyperkinesia       | 0 (0; 8)                                                                  | 0 (0; 6)  |
|                                           | U=3737.50; p=0.731                                                        |           |
| Postural stability                        | 0 (0; 1)                                                                  | 0 (0; 0)  |
|                                           | U=3680.00; p=0.563                                                        |           |
| ESRS subscale VI (CGI-S of parkinsonism)  | 2 (0; 4)                                                                  | 3 (0; 4)  |
|                                           | U=4019.00; p=0.637                                                        |           |
| SRS subscale VIII (Stage of parkinsonism) | 2 (0; 3)                                                                  | 2 (0; 3)  |
|                                           | U=3795.50; p=0.882                                                        |           |
| ESRS subscore Hypokinesia                 | 0 (0; 12)                                                                 | 0 (0; 9)  |
|                                           | U=3780.00; p=0.846                                                        |           |

Data are expressed as median (Q1; Q3) and compared with Mann-Whitney U test. Since the *HTR2C* gene is located on the X chromosome and study enrolled only male subjects, for the rs3813929 polymorphism only allele carriers could be analyzed.

**Supplementary table S2.** ESRS based AIP scores in haloperidol-treated schizophrenia patients with different *HTR2C* rs518147 alleles.

| Parkinsonism examination instrument       | ESRS based AIP scores in different <i>HTR2C</i> rs518147 allele carriers |           |
|-------------------------------------------|--------------------------------------------------------------------------|-----------|
|                                           | C                                                                        | T         |
| ESRS subscale II for parkinsonism         | 6 (0; 18)<br>U=3731.50; p=0.747                                          | 4 (0; 17) |
| Expressive automatic movements            | 0 (0; 2)<br>U=3761.00; p=0.794                                           | 0 (0; 1)  |
| Bradykinesia                              | 0 (0; 2)<br>U=3785.00; p=0.853                                           | 0 (0; 2)  |
| Rigidity                                  | 0 (0; 6)<br>U=3719.50; p=0.702                                           | 0 (0; 6)  |
| Gait and posture                          | 0 (0; 2)<br>U=3809.00; p=0.907                                           | 0 (0; 2)  |
| Tremor / ESRS subscore Hyperkinesia       | 0 (0; 8)<br>U=3737.50; p=0.731                                           | 0 (0; 6)  |
| Postural stability                        | 0 (0; 1)<br>U=3680.00; p=0.563                                           | 0 (0; 0)  |
| ESRS subscale VI (CGI-S of parkinsonism)  | 2 (0; 4)<br>U=4019.00; p=0.637                                           | 3 (0; 4)  |
| SRS subscale VIII (Stage of parkinsonism) | 2 (0; 3)<br>U=3795.50; p=0.882                                           | 2 (0; 3)  |
| ESRS subscore Hypokinesia                 | 0 (0; 12)<br>U=3780.00; p=0.846                                          | 0 (0; 9)  |

Data are expressed as median (Q1; Q3) and compared with Mann-Whitney U test. Since the *HTR2C* gene is located on the X chromosome and study enrolled only male subjects, for the rs518147 polymorphism only allele carriers could be analyzed.

**Supplementary table S3.** ESRS based AIP scores in haloperidol-treated schizophrenia patients with different *HTR2C* rs3813929-rs518147 haplotypes.

| Parkinsonism examination instrument       | ESRS based AIP scores in different <i>HTR2C</i> rs3813929-rs518147 haplotype carriers |                              |           |
|-------------------------------------------|---------------------------------------------------------------------------------------|------------------------------|-----------|
|                                           | CC                                                                                    | CG                           | TC        |
| ESRS subscale II for parkinsonism         | 0 (0; 20)                                                                             | 9 (0; 18)<br>H=1.14; p=0.567 | 5 (0; 17) |
| Expressive movements                      | 0 (0; 1)                                                                              | 0 (0; 2)<br>H=0.35; p=0.838  | 0 (0; 1)  |
| Bradykinesia                              | 0 (0; 1)                                                                              | 0 (0; 2)<br>H=0.97; p=0.617  | 0 (0; 2)  |
| Rigidity                                  | 0 (0; 6)                                                                              | 0 (0; 6)<br>H=0.20; p=0.905  | 0 (0; 6)  |
| Gait and posture                          | 0 (0; 2)                                                                              | 0 (0; 2)<br>H=0.88; p=0.644  | 0 (0; 2)  |
| Tremor / ESRS subscore Hyperkinesia       | 0 (0; 7)                                                                              | 0 (0; 8)<br>H=0.47; p=0.789  | 0 (0; 6)  |
| Postural stability                        | 0 (0; 0)                                                                              | 0 (0; 1)<br>H=0.56; p=0.755  | 0 (0; 0)  |
| ESRS subscale VI (CGI-S of parkinsonism)  | 0 (0; 3)                                                                              | 3 (0; 4)<br>H=4.53; p=0.104  | 3 (0; 4)  |
| SRS subscale VIII (Stage of parkinsonism) | 0 (0; 3)                                                                              | 2 (0; 3)<br>H=2.50; p=0.287  | 2 (0; 3)  |
| ESRS subscore Hypokinesia                 | 0 (0; 12)                                                                             | 2 (0; 12)<br>H=0.57; p=0.754 | 3 (0; 9)  |

Data are expressed as median (Q1; Q3) and compared with Kruskal-Wallis H test.

**Supplementary table S4.** ESRS based AIP scores in haloperidol-treated schizophrenia patients with different *HTR6* rs1805054 genotypes.

| Parkinsonism examination instrument       | ESRS based AIP scores in different <i>HTR6</i> rs1805054 genotype carriers |                                           |            |
|-------------------------------------------|----------------------------------------------------------------------------|-------------------------------------------|------------|
|                                           | CC                                                                         | CT                                        | TT         |
| ESRS subscale II for parkinsonism         | 1 (0; 15)                                                                  | 12 (0; 21)<br><i>H=6.06, p=0.048</i>      | 14 (5; 21) |
| Expressive automatic movements            | 0 (0; 2)                                                                   | 0 (0; 2)<br><i>H=0.41; p=0.816</i>        | 0 (0; 2)   |
| Bradykinesia                              | 0 (0; 1)                                                                   | 1 (0; 2)<br><i>H=2.40; p=0.302</i>        | 1 (0; 3)   |
| Rigidity                                  | 0 (0; 2)                                                                   | 2 (0; 8)<br><i>H=6.90; p=0.032</i>        | 4 (0; 8)   |
| Gait and posture                          | 0 (0; 1)                                                                   | 0 (0; 2)<br><i>H=2.85; p=0.241</i>        | 1 (0; 2)   |
| Tremor / ESRS subscore Hyperkinesia       | 0 (0; 6)                                                                   | 0 (0; 9)<br><i>H=8.89; <b>p=0.012</b></i> | 8 (1; 10)  |
| Postural stability                        | 0 (0; 0)                                                                   | 0 (0; 1)<br><i>H=1.77; p=0.413</i>        | 0 (0; 1)   |
| ESRS subscale VI (CGI-S of parkinsonism)  | 2 (0; 4)                                                                   | 3 (0; 4)<br><i>H=2.92; p=0.232</i>        | 4 (1; 4)   |
| SRS subscale VIII (Stage of parkinsonism) | 1 (0; 3)                                                                   | 2 (0; 3)<br><i>H=3.23; p=0.199</i>        | 2 (1; 3)   |
| ESRS subscore Hypokinesia                 | 0 (0; 11)                                                                  | 3 (0; 13)<br><i>H=3.33; p=0.189</i>       | 7 (0; 14)  |

Data are expressed as median (Q1; Q3) and compared with Kruskal-Wallis H test. Statistically significant result is shown in bold, while nominally significant results, rejected after the Bonferroni correction, are shown in italics.

**Supplementary table S5.** ESRS based AIP scores in haloperidol-treated schizophrenia patients with different *SLC6A3* 3'UTR VNTR genotypes.

| Parkinsonism examination instrument       | ESRS based AIP scores in different <i>SLC6A3</i> 3'UTR VNTR genotype carriers |                              |           |
|-------------------------------------------|-------------------------------------------------------------------------------|------------------------------|-----------|
|                                           | 10R/10R                                                                       | 9R/10R                       | 9R/9R     |
| ESRS subscale II for parkinsonism         | 2 (0; 15)                                                                     | 9 (0; 20)<br>H=3.87; p=0.145 | 1 (0; 20) |
| Expressive automatic movements            | 0 (0; 1)                                                                      | 0 (0; 2)<br>H=0.43; p=0.805  | 0 (0; 2)  |
| Bradykinesia                              | 0 (0; 1)                                                                      | 0 (0; 2)<br>H=0.31; p=0.856  | 0 (0; 1)  |
| Rigidity                                  | 0 (0; 6)                                                                      | 0 (0; 8)<br>H=1.53; p=0.465  | 0 (0; 4)  |
| Gait and posture                          | 0 (0; 1)                                                                      | 0 (0; 2)<br>H=0.78; p=0.679  | 0 (0; 2)  |
| Tremor / ESRS subscore Hyperkinesia       | 0 (0; 6)                                                                      | 0 (0; 8)<br>H=3.28; p=0.194  | 0 (0; 8)  |
| Postural stability                        | 0 (0; 0)                                                                      | 0 (0; 1)<br>H=0.61; P=0.737  | 0 (0; 1)  |
| ESRS subscale VI (CGI-S of parkinsonism)  | 1 (0; 4)                                                                      | 3 (0; 4)<br>H=5.96; p=0.051  | 3 (0; 4)  |
| SRS subscale VIII (Stage of parkinsonism) | 1 (0; 3)                                                                      | 2 (0; 3)<br>H=5.77; p=0.056  | 2 (0; 3)  |
| ESRS subscore Hypokinesia                 | 0 (0; 11)                                                                     | 0 (0; 13)<br>H=1.09; p=0.580 | 0 (0; 10) |

Data are expressed as median (Q1; Q3) and compared with Kruskal-Wallis H test. 10R/10R=10 repeats homozygotes; 9R/10R=heterozygotes; 9R/9R=9 repeats homozygotes.
